# Supplementary material for: Characterization of Zygosaccharomyces lentus Yeast in Hungarian Botrytized Wines
Source: MDPI journal article supplement (doi:10.3390/microorganisms11040852), 2023-03-27
Supplement: s1 [file s1]

**Table S3.** Extracellular enzyme activity assays of some *Z. lentus* isolates.

| Yeast strains         | Extracellular enzymes activity* |         |        |           |        |                               |        |                      |        |                    |
|-----------------------|---------------------------------|---------|--------|-----------|--------|-------------------------------|--------|----------------------|--------|--------------------|
|                       | Protease                        | Amylase |        | Cellulase |        | $\alpha$ -arabinofuranosidase |        | $\beta$ -glycosidase |        | Sulphite reductase |
|                       | pH 5.0                          | pH 3.5  | pH 5.0 | pH 3.5    | pH 5.0 | pH 3.5                        | pH 5.0 | pH 3.5               | pH 5.0 |                    |
| S288c                 | +/+                             | -/+     | +/+    | -/-       | -/-    | -/-                           | -/-    | +/+                  | +/+    | 5/5                |
| CBS 8574 <sup>T</sup> | -/-                             | -/-     | -/-    | -/-       | -/-    | -/-                           | -/-    | -/w                  | w/w    | 1/1                |
| 10-1405               | -/-                             | -/-     | -/-    | -/-       | -/-    | -/-                           | -/-    | w/w                  | w/w    | 3/3                |
| 10-1406               | -/-                             | -/-     | -/-    | -/-       | -/-    | -/-                           | -/-    | w/w                  | w/w    | 2/2                |
| 10-1407               | -/-                             | -/-     | -/-    | -/-       | -/-    | -/-                           | -/-    | w/w                  | w/w    | 2/3                |
| 10-1408               | -/-                             | -/-     | -/-    | -/-       | -/-    | -/-                           | -/-    | w/w                  | w/w    | 2/3                |
| 10-1409               | -/-                             | -/-     | -/-    | -/-       | -/-    | -/-                           | -/-    | w/w                  | w/+    | 3/3                |
| 10-1410               | -/-                             | -/-     | -/-    | -/-       | -/-    | -/-                           | -/-    | w/w                  | w/w    | 3/3                |
| 10-1412               | -/-                             | -/-     | -/-    | -/-       | -/-    | -/-                           | -/-    | w/w                  | w/w    | 4/4                |
| 10-1413               | -/-                             | -/-     | -/-    | -/-       | -/-    | -/-                           | -/-    | w/w                  | +/+    | 4/4                |
| 10-1414               | -/-                             | -/-     | -/-    | -/-       | -/-    | -/-                           | -/-    | w/w                  | w/w    | 4/4                |
| 10-1628               | -/-                             | -/-     | -/-    | -/-       | -/-    | -/-                           | -/-    | w/w                  | w/+    | 4/4                |
| 11-1343               | -/-                             | -/-     | -/-    | -/-       | -/-    | -/-                           | -/-    | w/w                  | w/+    | 3/3                |
| 11-1344               | -/-                             | -/-     | -/-    | -/-       | -/-    | -/-                           | -/-    | +/+                  | w/+    | 3/3                |
| CBS 8517              | -/-                             | -/-     | -/-    | -/-       | -/-    | -/-                           | -/-    | w/w                  | w/+    | 4/4                |
| CBS 2900              | -/-                             | -/-     | -/-    | -/-       | -/-    | -/-                           | -/-    | w/w                  | w/+    | 1/1                |
| CBS 3014              | -/-                             | -/-     | -/-    | -/-       | -/-    | -/-                           | -/-    | w/w                  | w/w    | 2/2                |

\*Detected enzyme activity and H<sub>2</sub>S production on the 4th day/on the 7th day.

+, activity detected; -, activity not detected; w, medium activity

Arbitrary scaling: (1) cream, (2) light brown, (3) brown, (4) dark brown, (5) black colour of the yeast colony.
