# Supplementary material for: Characterization of Zygosaccharomyces lentus Yeast in Hungarian Botrytized Wines
Source: MDPI journal article supplement (doi:10.3390/microorganisms11040852), 2023-03-27
Supplement: s1 [file s1]

**Table S1.** Summary of the results obtained by the molecular typing methods used.

| Strains               | Pattern       |                |              |                    | Karyotype |
|-----------------------|---------------|----------------|--------------|--------------------|-----------|
|                       | mtDNA-RFLP    |                |              | Microsatellite     |           |
|                       | <i>Hinf</i> I | <i>Hae</i> III | <i>Rsa</i> I | (GTG) <sub>5</sub> |           |
| 10-1405               | A             | a              | x            | 1                  | I         |
| 10-1645               | A             | a              | x            | 2                  | II        |
| 10-1646               | A             | a              | x            | 3                  | III       |
| 10-1406               | A             | a              | x            | 4                  | IV        |
| 10-1407               | A             | a              | x            | 5                  | IV        |
| 10-1647               | A             | a              | x            | 6                  | III       |
| 10-1408               | A             | a              | x            | 1                  | V         |
| 10-1409               | B             | b              | y            | 7                  | VI        |
| 10-1648               | A             | a              | x            | 1                  | I         |
| 10-1410               | A             | a              | x            | 8                  | IV        |
| <b>10-1629</b>        | B             | b              | y            | 9                  | VII       |
| <b>10-1412</b>        | B             | b              | y            | 9                  | VII       |
| <b>10-1413</b>        | B             | b              | y            | 9                  | VII       |
| <b>10-1630</b>        | B             | b              | y            | 9                  | VII       |
| <b>10-1631</b>        | B             | b              | y            | 9                  | VII       |
| <b>10-1414</b>        | B             | b              | y            | 9                  | VII       |
| <b>10-1632</b>        | B             | b              | y            | 9                  | VII       |
| 10-1633               | B             | b              | y            | 10                 | VII       |
| <b>10-1634</b>        | B             | b              | y            | 9                  | VII       |
| 10-1635               | B             | b              | y            | 11                 | VII       |
| <b>10-1636</b>        | B             | b              | y            | 9                  | VII       |
| <b>10-1637</b>        | B             | b              | y            | 9                  | VII       |
| <b>10-1638</b>        | B             | b              | y            | 9                  | VII       |
| <b>10-1639</b>        | B             | b              | y            | 9                  | VII       |
| <b>10-1628</b>        | B             | b              | y            | 9                  | VII       |
| 10-1640               | B             | b              | y            | 12                 | VII       |
| <b>10-1641</b>        | B             | b              | y            | 9                  | VII       |
| <b>10-1642</b>        | B             | b              | y            | 9                  | VII       |
| <b>10-1643</b>        | B             | b              | y            | 9                  | VII       |
| <b>10-1644</b>        | B             | b              | y            | 9                  | VII       |
| 11-1343               | B             | b              | y            | 13                 | VIII      |
| 11-1344               | B             | b              | y            | 13                 | IX        |
| CBS 8574 <sup>T</sup> | C             | c              | y            | 7                  | X         |
| CBS 2900              | B             | b              | y            | 14                 | VII       |
| CBS 3014              | B             | b              | y            | 15                 | XI        |
| CBS 8517              | D             | d              | z            | 16                 | XII       |

The bold-highlighted strains have the same molecular profile.
