# Supplementary material for: Characterization of Zygosaccharomyces lentus Yeast in Hungarian Botrytized Wines
Source: MDPI journal article supplement (doi:10.3390/microorganisms11040852), 2023-03-27
Supplement: s1 [file s1]

**Table S2.** Results obtained from the physiological tests of the *Z. lentus* isolates used in this study.

| Strains               | Acid production on<br>CaCO <sub>3</sub> agar | Sulphur 700 mg/L | Sulphur 800 mg/L | Sulphur 900 mg/L | Ethanol 6% v/v | Ethanol 8% v/v | Ethanol 10% v/v | Ethanol 12% v/v | Sugar 50% | Sugar 60% | Sugar 70% | 10 °C, YPGA pH 3.5 | 24 °C, YPGA pH 3.5 | 24 °C, YPGA pH 6.8 |
|-----------------------|----------------------------------------------|------------------|------------------|------------------|----------------|----------------|-----------------|-----------------|-----------|-----------|-----------|--------------------|--------------------|--------------------|
| 10-1405               |                                              |                  |                  |                  |                |                |                 |                 |           |           |           |                    |                    |                    |
| 10-1645               |                                              |                  |                  |                  |                |                |                 |                 |           |           |           |                    |                    |                    |
| 10-1646               |                                              |                  |                  |                  |                |                |                 |                 |           |           |           |                    |                    |                    |
| 10-1406               |                                              |                  |                  |                  |                |                |                 |                 |           |           |           |                    |                    |                    |
| 10-1407               |                                              |                  |                  |                  |                |                |                 |                 |           |           |           |                    |                    |                    |
| 10-1647               |                                              |                  |                  |                  |                |                |                 |                 |           |           |           |                    |                    |                    |
| 10-1408               |                                              |                  |                  |                  |                |                |                 |                 |           |           |           |                    |                    |                    |
| 10-1409               |                                              |                  |                  |                  |                |                |                 |                 |           |           |           |                    |                    |                    |
| 10-1648               |                                              |                  |                  |                  |                |                |                 |                 |           |           |           |                    |                    |                    |
| 10-1410               |                                              |                  |                  |                  |                |                |                 |                 |           |           |           |                    |                    |                    |
| 10-1629               |                                              |                  |                  |                  |                |                |                 |                 |           |           |           |                    |                    |                    |
| 10-1412               |                                              |                  |                  |                  |                |                |                 |                 |           |           |           |                    |                    |                    |
| 10-1413               |                                              |                  |                  |                  |                |                |                 |                 |           |           |           |                    |                    |                    |
| 10-1630               |                                              |                  |                  |                  |                |                |                 |                 |           |           |           |                    |                    |                    |
| 10-1631               |                                              |                  |                  |                  |                |                |                 |                 |           |           |           |                    |                    |                    |
| 10-1414               |                                              |                  |                  |                  |                |                |                 |                 |           |           |           |                    |                    |                    |
| 10-1632               |                                              |                  |                  |                  |                |                |                 |                 |           |           |           |                    |                    |                    |
| 10-1633               |                                              |                  |                  |                  |                |                |                 |                 |           |           |           |                    |                    |                    |
| 10-1634               |                                              |                  |                  |                  |                |                |                 |                 |           |           |           |                    |                    |                    |
| 10-1635               |                                              |                  |                  |                  |                |                |                 |                 |           |           |           |                    |                    |                    |
| 10-1636               |                                              |                  |                  |                  |                |                |                 |                 |           |           |           |                    |                    |                    |
| 10-1637               |                                              |                  |                  |                  |                |                |                 |                 |           |           |           |                    |                    |                    |
| 10-1638               |                                              |                  |                  |                  |                |                |                 |                 |           |           |           |                    |                    |                    |
| 10-1639               |                                              |                  |                  |                  |                |                |                 |                 |           |           |           |                    |                    |                    |
| 10-1628               |                                              |                  |                  |                  |                |                |                 |                 |           |           |           |                    |                    |                    |
| 10-1640               |                                              |                  |                  |                  |                |                |                 |                 |           |           |           |                    |                    |                    |
| 10-1641               |                                              |                  |                  |                  |                |                |                 |                 |           |           |           |                    |                    |                    |
| 10-1642               |                                              |                  |                  |                  |                |                |                 |                 |           |           |           |                    |                    |                    |
| 10-1643               |                                              |                  |                  |                  |                |                |                 |                 |           |           |           |                    |                    |                    |
| 10-1644               |                                              |                  |                  |                  |                |                |                 |                 |           |           |           |                    |                    |                    |
| 11-1343               |                                              |                  |                  |                  |                |                |                 |                 |           |           |           |                    |                    |                    |
| 11-1344               |                                              |                  |                  |                  |                |                |                 |                 |           |           |           |                    |                    |                    |
| CBS 8574 <sup>T</sup> |                                              |                  |                  |                  |                |                |                 |                 |           |           |           |                    |                    |                    |
| CBS 2900              |                                              |                  |                  |                  |                |                |                 |                 |           |           |           |                    |                    |                    |
| CBS 3014              |                                              |                  |                  |                  |                |                |                 |                 |           |           |           |                    |                    |                    |
| CBS 8517              |                                              |                  |                  |                  |                |                |                 |                 |           |           |           |                    |                    |                    |
| EC1118                |                                              |                  |                  |                  |                |                |                 |                 |           |           |           |                    |                    |                    |

|  |    |
|--|----|
|  | -  |
|  | w- |
|  | w  |
|  | +  |
|  | ++ |
